# Supplementary material for: Implications of Hybridization, NUMTs, and Overlooked Diversity for DNA Barcoding of Eurasian Ground Squirrels
Source: PLoS One. 2015 Jan 24;10(1):e0117201. doi: 10.1371/journal.pone.0117201 (PMC4305304; doi:10.1371/journal.pone.0117201)
Supplement: S1 Table — (XLS) [file pone.0117201.s001.xls]

## Sheet: SpecimenData
Locality number*	Country	Region	District	Site	Lat	Long	Species	Museum ID	Institution Storing	Collectors	GenBank	Process ID	BIN
Palearctic Ground Squirrels
1	Poland		Lublin	-	51.38	22.41	Spermophilus suslicus	PSPU-513	Penza State University	Godnek O.A.	KM537888	ABGPA105-09	BOLD:AAC1096
2	Ukraine	Chernivtsi Region	Kelmeneckiy	Novoselica village	48.20	26.27	Spermophilus suslicus	S-103423	Zoological Museum of Moscow State University	Petrov	KM537895	ABGPA114-14	BOLD:AAC1096
3	Moldova	Transnistria	Kamenskiy	Zhabka village	47.97	28.68	Spermophilus citellus	IDB-23937	Koltzov Institute of Developmental Biology, Russian Academy of Sciences	Mikhailenko A.G.	KM537970	ABGPA083-07	BOLD:AAJ3879
4	Ukraine	Odessa Region	-	Odessa city	46.67	30.80	Spermophilus suslicus	PSPU-209S	Penza State University	Lobkov A.V.	KM537892	ABGPA055-07	BOLD:AAC1096
5	Turkey	Antalya	Akseki	Yarpuz	37.13	31.85	Spermophilus taurensis	unknown	Department of Zoology, Charles University in Prague	Gvozdik V.	KM537977	ABGPA115-14	BOLD:ACO5057
6	Ukraine	Autonomous Republic of Crimea	Sovetskiy	-	45.20	34.56	Spermophilus pygmaeus	PSPU-654P	Penza State University	Tovpinets N.N., Evstfiev I.L.	KM537920	ABGPA112-10	BOLD:AAB9091
7	Russia	Moscow Region	Zarayskiy	-	54.65	38.47	Spermophilus suslicus	PSPU-270S	Penza State University	Shekarova O.	KM537939	ABGPA071-07	BOLD:AAC1095
8	Russia	Rostov Region	Taganrogskiy	Lakademonovka village	47.18	38.52	Spermophilus pygmaeus	PSPU-503P	Penza State University	Ermakov O.A., Titov S.V.	KM537910	ABGPA072-07	BOLD:AAB9091
9	Russia	Lipetsk Region	Zadonskiy	Galichya Gora	52.60	38.85	Spermophilus suslicus	PSPU-205S	Penza State University	Bystrakova N.V.	KM537974	ABGPA063-07	BOLD:AAC1095
10	Russia	Republic of Kabardino-Balkaria	El'brusskiy	5 km NW of El'brus village	43.28	42.60	Spermophilus musicus	IDB-23850	Koltzov Institute of Developmental Biology, Russian Academy of Sciences	Brandler O.V.	KM537982	ABGPA002-07	BOLD:AAB9091
10	Russia	Republic of Kabardino-Balkaria	El'brusskiy	5 km NW of El'brus village	43.28	42.60	Spermophilus musicus	IDB-23851	Koltzov Institute of Developmental Biology, Russian Academy of Sciences	Brandler O.V.	KM537943	ABGPA010-07	BOLD:AAB9091
10	Russia	Republic of Kabardino-Balkaria	El'brusskiy	5 km NW of El'brus village	43.28	42.60	Spermophilus musicus	IDB-23845	Koltzov Institute of Developmental Biology, Russian Academy of Sciences	Brandler O.V.	KM537973	ABGPA091-07	BOLD:AAB9091
11	Russia	Volgograd Region	Surovikinskiy	Popov-2 village	48.73	42.88	Spermophilus pygmaeus	PSPU-502P	Penza State University	Ermakov O.A., Titov S.V.	KM537887	ABGPA080-07	BOLD:AAB9091
12	Russia	Volgograd Region	Elanskiy	Rodinskiy village	50.92	43.40	Spermophilus pygmaeus	PSPU-105P	Penza State University	Titov S.V.	KM537891	ABGPA031-07	BOLD:AAB9091
13	Russia	Saratov Region	Balashovskiy	Sotszemel'skiy village	51.67	43.68	Spermophilus suslicus	PSPU-103S	Penza State University	Titov S.V.	KM537915	ABGPA087-07	BOLD:AAC1095
14	Armenia	Yerevan		near Yerevan city	40.17	44.35	Spermophilus xanthoprymnus	PSPU-435X	Penza State University	Unknown	KM537908	ABGPA059-07	BOLD:AAJ3971
15	Russia	Volgograd Region	Svetloyarskiy	Dubovyj Ovrag village	48.33	44.60	Spermophilus pygmaeus	PSPU-128P	Penza State University	Titov S.V.	KM537928	ABGPA015-07	BOLD:AAB9091
16a	Russia	Volgograd Region	Dubovskiy	Gorniy Balykley village	49.65	45.40	Spermophilus pygmaeus	PSPU-120P	Penza State University	Titov S.V.	KM537932	ABGPA088-07	BOLD:AAB9091
16b	Russia	Volgograd Region	Bykovskiy	8 km E of Bykovo village	49.75	45.48	Spermophilus fulvus	PSPU-140F	Penza State University	Titov S.V.	KM537948	ABGPA036-07	BOLD:AAB9093
16c	Russia	Volgograd Region	Bykovskiy	Krasnoselets village	49.68	45.75	Spermophilus pygmaeus	PSPU-135P	Penza State University	Titov S.V.	KM537950	ABGPA032-07	BOLD:AAB9092
17	Russia	Nizhny Novgorod Region	Sechenovskiy	Novoselki village	55.28	45.75	Spermophilus suslicus	PSPU-202S	Penza State University	Ermakov O.A., Titov S.V.	KM537904	ABGPA006-07	BOLD:AAC1095
18	Russia	Saratov Region	Saratovskiy	15 km SW of Saratov, Popovka village	51.45	45.85	Spermophilus pygmaeus	PSPU-175P	Penza State University	Titov S.V.	KM537909	ABGPA023-07	BOLD:AAB9091
19	Russia	Republic of Mordovia	Atyashevskiy	Alasheevka village	54.63	46.20	Spermophilus suslicus	PSPU-188S	Penza State University	Titov S.V.	KM537900	ABGPA038-07	BOLD:AAC1095
20	Russia	Astrakhan Region	Enotaevskiy	Nikolskoe village	47.75	46.38	Spermophilus pygmaeus	PSPU-149P	Penza State University	Iljin V.Ju.	KM537952	ABGPA007-07	BOLD:AAB9091
21a	Russia	Saratov Region	Engel'sskiy	Voskresenka village	50.97	46.48	Spermophilus major	PSPU-145M	Penza State University	Titov S.V.	KM537951	ABGPA062-07	BOLD:AAC0177
21b	Russia	Saratov Region	Krasnokutskiy	Dyakovka village	50.72	46.75	Spermophilus fulvus	PSPU-039F	Penza State University	Ermakov O.A.	KM537947	ABGPA052-07	BOLD:AAB9093
21c	Russia	Saratov Region	Rovenskiy	Yablonovka village	51.05	46.05	Spermophilus fulvus	PSPU-036F	Penza State University	Ermakov O.A.	KM537954	ABGPA044-07	BOLD:AAB9093
22	Russia	Astrakhan Region	Akhtubinskiy	Nizhniy Baskunchak village	48.23	46.82	Spermophilus pygmaeus	PSPU-150P	Penza State University	Iljin V.Ju.	KM537889	ABGPA024-07	BOLD:AAB9092
23	Russia	Ulyanovskaya Oblast	Nikolaevskiy	Klin village	53.10	47.21	Spermophilus suslicus	PSPU-063S	Penza State University	Ermakov O.A., Titov S.V.	KM537907	ABGPA030-07	BOLD:AAC1095
23	Russia	Ulyanovskaya Oblast	Nikolaevskiy	Klin village	53.10	47.21	Spermophilus major	PSPU-464M	Penza State University	Titov S.V.	KM537949	ABGPA053-07	BOLD:AAB9092
23	Russia	Ulyanovskaya Oblast	Nikolaevskiy	Klin village	53.10	47.21	Spermophilus suslicus	PSPU-163S	Penza State University	Titov S.V.	KM537981	ABGPA079-07	BOLD:AAC1095
24	Russia	Saratov Region	Vol'skiy	Verhnyaya Chernavka village	52.15	47.25	Spermophilus major	PSPU-090M	Penza State University	Ermakov O.A., Titov S.V.	KM537902	ABGPA070-07	BOLD:AAC0177
25a	Russia	Ulyanovskaya Oblast	Korsunskiy	Ureno-Karlinskoe village	54.30	47.30	Spermophilus suslicus	PSPU-182S	Penza State University	Titov S.V.	KM537978	ABGPA054-07	BOLD:AAC1095
25b	Russia	Ulyanovskaya Oblast	Surskiy	3 km NE of Surskoe village	54.50	46.77	Spermophilus suslicus	PSPU-176S	Penza State University	Titov S.V.	KM537922	ABGPA022-07	BOLD:AAC1095
25c	Russia	Ulyanovskaya Oblast	Tsil'ninskiy	Timersyany village	54.53	47.82	Spermophilus suslicus	PSPU-184S	Penza State University	Titov S.V.	KM537959	ABGPA046-07	BOLD:AAC1095
26	Russia	Republic of Chuvashia	Tsyvil'skiy	Ryndino village	55.85	47.37	Spermophilus major	PSPU-272M	Penza State University	Ermakov O.A., Titov S.V.	KM537975	ABGPA061-07	BOLD:AAB9093
26	Russia	Republic of Chuvashia	Tsyvil'skiy	Ryndino village	55.85	47.37	Spermophilus suslicus	PSPU-199S	Penza State University	Ermakov O.A., Titov S.V.	KM537956	ABGPA039-07	BOLD:AAC1095
27	Kazakhstan	West Kazakhstan Province	Bokey Orda	Urda village	48.77	47.42	Spermophilus fulvus	PSPU-431F	Penza State University	Iljin V.Ju.	KM537905	ABGPA028-07	BOLD:AAB9093
28	Russia	Saratov Region	Piterskiy	Novotulka village	50.83	47.52	Spermophilus pygmaeus	PSPU-025P	Penza State University	Ermakov O.A.	KM537911	ABGPA089-07	BOLD:AAB9092
29	Russia	Republic of Chuvashia	Batyrevskiy	Batyrevo village	55.08	47.63	Spermophilus suslicus	PSPU-218S	Penza State University	Titov S.V.	KM537965	ABGPA014-07	BOLD:AAC1095
30	Russia	Ulyanovskaya Oblast	Kuzovatovskiy	Smyshlyaevka village	53.78	47.73	Spermophilus major	PSPU-068M	Penza State University	Titov S.V.	KM537971	ABGPA045-07	BOLD:AAB9092
31	Russia	Saratov Region	Ershovskiy	5 km W of Ershov village	51.35	48.18	Spermophilus major	PSPU-012M	Penza State University	Ermakov O.A.	KM537906	ABGPA085-07	BOLD:AAB9092
32	Russia	Saratov Region	Dergachovskiy	Stepanovka village	51.30	49.00	Spermophilus pygmaeus	PSPU-005P	Penza State University	Ermakov O.A.	KM537913	ABGPA064-07	BOLD:AAB9092
33	Russia	Samara Region	Stavropol'skiy	Musorka village	53.78	49.73	Spermophilus major	PSPU-051M	Penza State University	Ermakov O.A.	KM537960	ABGPA078-07	BOLD:AAC0177
34	Kazakhstan	Atyrau Region	Qzylkoginskiy	Miyaly village	48.88	53.70	Spermophilus fulvus	PSPU-571F	Penza State University	Ermakov O.A., Titov S.V.	KM537967	ABGPA020-07	BOLD:AAB9093
34	Kazakhstan	Atyrau Region	Qzylkoginskiy	Miyaly village	48.88	53.70	Spermophilus fulvus	PSPU-573F	Penza State University	Ermakov O.A., Titov S.V.	KM537937	ABGPA060-07	BOLD:AAC0177
35	Russia	Orenburg Region	Tashlinskiy	Shestakovka village	52.08	54.00	Spermophilus pygmaeus	PSPU-294P	Penza State University	Ermakov O.A., Titov S.V.	KM537940	ABGPA016-07	BOLD:AAB9092
36	Kazakhstan	Atyrau Region	Qzylkoginskiy	3 km W of Sagys village	48.23	54.86	Spermophilus pygmaeus	PSPU-570P	Penza State University	Ermakov O.A., Titov S.V.	KM537963	ABGPA008-07	BOLD:AAB9092
37	Kazakhstan	Aktobe Region	Khobdinskiy	2 km S of Bulak village	49.85	55.23	Spermophilus major	PSPU-585M	Penza State University	Ermakov O.A., Titov S.V.	KM537946	ABGPA077-07	BOLD:AAB9093
37	Kazakhstan	Aktobe Region	Khobdinskiy	2 km S of Bulak village	49.85	55.23	Spermophilus pygmaeus	PSPU-590P	Penza State University	Ermakov O.A., Titov S.V.	KM537938	ABGPA056-07	BOLD:AAB9093
38	Russia	Republic of Bashkortostan	Aurgazinskiy	Tolbazy village	54.07	55.92	Spermophilus major	PSPU-158M	Penza State University	Luk'yanov S.B.	KM537896	ABGPA094-07	BOLD:AAC0177
39	Russia	Republic of Bashkortostan	Ishimbayskiy	Makarovo village	53.63	56.60	Spermophilus major	PSPU-170M	Penza State University	Smirnov D.G.	KM537885	ABGPA037-07	BOLD:AAC0177
40a	Kazakhstan	Aktobe Region	Mugalzharskiy	Pokrovka village	49.40	57.30	Spermophilus major	PSPU-395M	Penza State University	Ermakov O.A., Titov S.V.	KM537983	ABGPA029-07	BOLD:AAC0177
40b	Kazakhstan	Aktobe Region	Mugalzharskiy	Kumsay village	49.5	58.55	Spermophilus fulvus	PSPU-385F	Penza State University	Ermakov O.A., Titov S.V.	KM537921	ABGPA068-07	BOLD:AAC0177
41	Turkmenistan	Dashoguz Region	unknown	unknown	41.83	57.37	Spermophilus fulvus	ZMMU S-152589	Zoological Museum of Moscow State University	Cherenkov	KM537927	ABGPA011-07	BOLD:AAB9093
42	Russia	Republic of Bashkortostan	Zilairskiy	Kashkarovo village	52.33	57.77	Spermophilus major	PSPU-352M	Penza State University	Ermakov O.A.	KM537976	ABGPA021-07	BOLD:AAC0177
43	Kazakhstan	Aktobe Region	Mugalzharskiy	10 km N of village Emba	48.85	58.28	Spermophilus pygmaeus	PSPU-390P	Penza State University	Ermakov O.A., Titov S.V.	KM537919	ABGPA040-07	BOLD:AAB9092
44	Kazakhstan	Aktobe Region	Shalkarskiy	10 km E of Berchogur village	48.40	58.80	Spermophilus fulvus	PSPU-394F	Penza State University	Ermakov O.A., Titov S.V.	KM537958	ABGPA012-07	BOLD:AAB9093
45	Russia	Orenburg Region	Dombarovskiy	Ashche-Butak village	51.05	59.08	Spermophilus pygmaeus	PSPU-324P	Penza State University	Ermakov O.A., Titov S.V.	KM537912	ABGPA048-07	BOLD:AAB9092
45	Russia	Orenburg Region	Dombarovskiy	Ashche-Butak village	51.05	59.08	Spermophilus pygmaeus	PSPU-321M	Penza State University	Ermakov O.A., Titov S.V.	KM537941	ABGPA005-07	BOLD:AAC0177
46	Kazakhstan	Kyzylorda Region	Dzhusaminskiy	Kara-Uzyak river (mouth)	45.47	64.08	Spermophilus fulvus	ZMMU S-146049	Zoological Museum of Moscow State University	Puzachenko A.Ju.	KM537980	ABGPA003-07	BOLD:AAB9093
47	Uzbekistan	Bukhara Region	Bukharskiy	Karaul-Bazar village	39.50	64.78	Spermophilus fulvus	PSPU-417F	Penza State University	Formozov N.A.	KM537917	ABGPA004-07	BOLD:AAB9093
48a	Russia	Kurgan Region	Pritobolny	Utyatskoye	55.09	65.10	Spermophilus major	PSPU-608M	Penza State University	Starikov V.P.	KM537886	ABGPA107-09	BOLD:AAC0177
48b	Russia	Kurgan Region	Ketovsky	Temlyakovo	55.13	65.13	Spermophilus major	PSPU-617M	Penza State University	Starikov V.P.	KM537966	ABGPA108-09	BOLD:AAC0177
49	Kazakhstan	North Kazakhstan Province	Gabit Musirepov	Andreyevka	53.00	67.22	Spermophilus erythrogenys	PSPU-636E	Penza State University	Starikov V.P.	KM537953	ABGPA109-09	BOLD:AAC0177
50	Uzbekistan	Namangan Viloyat	Pop	Kuraminskiy ridge, Chapankuydy pass	41.27	71.45	Spermophilus relictus	IDB-24033	Koltzov Institute of Developmental Biology, Russian Academy of Sciences	Brandler O.V.	KM537936	ABGPA051-07	BOLD:AAI0108
51	Kazakhstan	Karagandy Region	Aktogay	5 km WNW of Akulen	46.80	75.75	Spermophilus brevicauda	ZMMU S-148349	Zoological Museum of Moscow State University	Shenbrot G.	KM537931	ABGPA074-07	BOLD:AAC0177
52	Kazakhstan	Almaty	Almaty	Almaty airport	43.13	76.50	Spermophilus fulvus	PSPU-357F	Penza State University	Brandler O.V., Korablev V.P.	KM537925	ABGPA093-07	BOLD:AAB9093
53	Russia	Novosibirsk Region	Karasukskiy	Karasuk village	53.70	78.08	Spermophilus erythrogenys	IDB-23967	Koltzov Institute of Developmental Biology, Russian Academy of Sciences	Korablev V.P.	KM537962	ABGPA096-08	BOLD:AAC4789
54	Kyrgyzstan	Issyk Kul Province	Jeti-Oguz	16 km W of Karakol'	42.43	78.18	Spermophilus ralli	ZMMU S-129865	Zoological Museum of Moscow State University	Koval'skaya Ju.M.	KM537916	ABGPA042-07	BOLD:ABZ4977
55	Kazakhstan	Almaty Region	Taldykorgan	Taldykorgan	45.00	78.38	Spermophilus brevicauda	ZMMU S-145355	Zoological Museum of Moscow State University	Shenbrot G.	KM537968	ABGPA090-07	BOLD:AAC0177
56	Kazakhstan	Almaty Region	-	Dzungarian Alatau, Kusachka river, Kekeli Mt.	44.48	78.51	Urocitellus undulatus	ISEA-18576	Institute of Systematics and Ecology of Animals, Russian Academy of Sciences	Unknown	KM537972	ABGPA103-09	BOLD:AAC0192
57	Kazakhstan	Almaty Region	Enbekshikazakh	Prudhoz village	43.70	78.58	Spermophilus brevicauda	IDB-23935	Koltzov Institute of Developmental Biology, Russian Academy of Sciences	Brandler O.V., Korablev V.P.	KM537957	ABGPA067-07	BOLD:AAC0177
58	Kazakhstan	Almaty Region	-	Lake Balkhash, east shore, former Burlyu-Tobe	46.30	79.00	Spermophilus erythrogenys	ISEA-59553	Institute of Systematics and Ecology of Animals, Russian Academy of Sciences	Lopatina N.V.	KM537897	ABGPA111-09	BOLD:ABZ4979
59	Kazakhstan	East Kazakhstan Province	Ayagoz	50 km N of Ayagoz	48.40	80.50	Spermophilus brevicauda	ZMMU S-143254	Zoological Museum of Moscow State University	Shenbrot G.	KM537964	ABGPA082-07	BOLD:AAC0177
60	Russia	Republic of Altai	Ust-Kansk		50.95	85.01	Urocitellus undulatus	ISEA-3482	Institute of Systematics and Ecology of Animals, Russian Academy of Sciences	Simonov E.P.	KM537923	ABGPA119-14	BOLD:AAC0192
61	Russia	Kemerovo Region	Belovo	Belovo	54.25	86.18	Spermophilus erythrogenys	ISEA-6524	Institute of Systematics and Ecology of Animals, Russian Academy of Sciences	Stroganov S.U.	KM537935	ABGPA104-09	BOLD:ABZ4978
62	Mongolia	Bayankhongor Province	-	70 km SW of Bayanhongor	46.20	99.57	Spermophilus pallidicauda	ZMMU S-135160	Zoological Museum of Moscow State University	Podtyazhkn O., Shenbrot G.	KM537918	ABGPA066-07	BOLD:AAC4788
63	Mongolia		-	12 km S of Har-Horin	47.18	102.21	Urocitellus undulatus	PSPU-23U	Zoological Museum of Moscow State University	Lebedev V.S.	KM537985	ABGPA110-09	BOLD:AAC0192
64	Mongolia	Uvurkhangai Province	Bogd	Arts Bogd Uul	44.55	102.22	Spermophilus alashanicus	IDB-24812	Koltzov Institute of Developmental Biology, Russian Academy of Sciences	Brandler O.V.	KM537979	ABGPA097-08	BOLD:AAI0105
65	Mongolia	Selenge Province	-	2 km N of bridge on Orkhon river	49.15	105.34	Spermophilus dauricus	ZMMU_71_08_118	Zoological Museum of Moscow State University	Tikhonov I.A.	KM537894	ABGPA117-14	BOLD:AAC0194
66a	Russia	Irkutsk Region	Irkutskiy	Bolshoe Goloustnoe village	52.05	105.45	Urocitellus undulatus	PSPU-014U	Penza State University	Tchabovsky A.V., Savinetskaya L.E.	KM537930	ABGPA033-07	BOLD:AAC0193
66b	Russia	Irkutsk Region	Irkutskiy	10 km NW of Bol. Goloustnoe village	52.12	105.35	Urocitellus undulatus	PSPU-012U	Penza State University	Tchabovsky A.V., Savinetskaya L.E.	KM537929	ABGPA017-07	BOLD:AAC0193
66c	Russia	Irkutsk Region	Irkutskiy	7 km NW of Bol. Goloustnoe village	52.10	105.38	Urocitellus undulatus	PSPU-027U	Penza State University	Tchabovsky A.V., Savinetskaya L.E.	KM537899	ABGPA025-07	BOLD:AAC0193
66c	Russia	Irkutsk Region	Irkutskiy	7 km NW of Bol. Goloustnoe village	52.10	105.38	Urocitellus undulatus	PSPU-066U	Penza State University	Tchabovsky A.V., Savinetskaya L.E.	KM537901	ABGPA041-07	BOLD:AAC0193
67	Mongolia	Dundgovi Province	Luus	50 km SW of Mandalgov	45.82	106.22	Spermophilus pallidicauda	IDB-24002	Koltzov Institute of Developmental Biology, Russian Academy of Sciences	Lyapunova E.A., Korablev V.P.	KM537942	ABGPA026-07	BOLD:AAC4788
68	Mongolia	Selenge Province	-	20 km NE of Buruunhaara	48.95	106.83	Urocitellus undulatus	PSPU-001U	Penza State University	Sheftel I.B.	KM537969	ABGPA009-07	BOLD:AAC0193
69a	Russia	Irkutsk Region	Olkhonskiy	Khaday village	53.08	107.05	Urocitellus undulatus	PSPU-033U	Penza State University	Tchabovsky A.V., Savinetskaya L.E.	KM537914	ABGPA065-07	BOLD:AAC0193
69b	Russia	Irkutsk Region	Olkhonskiy	Elga village	53.15	107.15	Urocitellus undulatus	PSPU-036U	Penza State University	Tchabovsky A.V., Savinetskaya L.E.	KM537898	ABGPA073-07	BOLD:AAC0193
69c	Russia	Irkutsk Region	Olkhonskiy	Khuzhir village	53.18	107.31	Urocitellus undulatus	PSPU-050U	Penza State University	Tchabovsky A.V., Savinetskaya L.E.	KM537934	ABGPA081-07	BOLD:AAC0193
69d	Russia	Irkutsk Region	Olkhonskiy	Sakhyurta village	53.00	106.83	Urocitellus undulatus	PSPU-058U	Penza State University	Tchabovsky A.V., Savinetskaya L.E.	KM537984	ABGPA057-07	BOLD:AAC0193
69e	Russia	Irkutsk Region	Olkhonskiy	Chernorud village	52.96	106.71	Urocitellus undulatus	PSPU-071U	Penza State University	Tchabovsky A.V., Savinetskaya L.E.	KM537945	ABGPA049-07	BOLD:AAC0193
70	Mongolia	Dornogovi Province	-	Hutag-Uul	43.35	110.22	Spermophilus alashanicus	ZMMU S-120122	Zoological Museum of Moscow State University	Sokolov V.E., Orlov V.N.	KM537893	ABGPA050-07	BOLD:AAI0105
71	Russia	Zabaykalsky Krai	Ononskiy	Ust-Imalka village	50.12	115.40	Spermophilus dauricus	IDB-23819	Koltzov Institute of Developmental Biology, Russian Academy of Sciences	Brandler O.V., Korablev V.P.	KM537955	ABGPA018-07	BOLD:AAC0194
72	Russia	Sakha (Yakutia) Republic	Verkhoyansky	Verkhoyansk	67.53	133.40	Urocitellus parryii	PSPU-510Pa	Penza State University	Titov S.V.	KM537890	ABGPA043-07	BOLD:ABY9739
73	Russia	Magadan Region	Khasynskiy	Atka village	60.83	151.77	Urocitellus parryii	IDB-23812	Koltzov Institute of Developmental Biology, Russian Academy of Sciences	Korablev V.P.	KM537933	ABGPA035-07	BOLD:ABY9739
74	Kazakhstan	Almaty Region	-	Pokatilovka	45.22	80.08	Spermophilus erythrogenys	ISEA-59552	Institute of Systematics and Ecology of Animals, Russian Academy of Sciences	Lopatina N.V.	KM537924	ABGPA102-09	BOLD:ABZ4979
New World Ground Squirrels
-	Canada	Saskatchewan	-	Maple Creek Area, 10 Mi S Of Lawrence Ranch, Highway 271	49.90	-109.48	Urocitellus richardsonii	ROM 91978	Royal Ontario Museum	Woodward S.M, Gibson J.S.	JF457124	ABRCR254-06	BOLD:ABY8843
-	Canada	Alberta	Kananaskis	Kananaskis Field Station	51.03	-115.03	Urocitellus columbianus	ROM 118694	Royal Ontario Museum	Bateman K.	JF457113	ABMWC055-06	BOLD:AAE2391
-	Canada	Alberta	Kananaskis	Kananaskis Field Station	51.03	-115.03	Urocitellus columbianus	ROM 118693	Biodiversity Institute of Ontario	Bateman K.	JF457112	ABMWC029-06	BOLD:AAE2391
-	Canada	Alberta	Kananaskis	vicinity of Barrier Lake UC Field Station, Prairieview Mountain	51.05	-115.08	Callospermophilus lateralis	HLC-16329	Biodiversity Institute of Ontario	Millar J.S., Borisenko A.V., Liu E.Y.	JF457121	ABMWC144-09	BOLD:AAE2387
-	Canada	British Columbia	Kootenay National Park	Marble Canyon	51.13	-116.55	Callospermophilus lateralis	ROM 118728	Royal Ontario Museum	Bateman K.	JF457119	ABMWC050-06	BOLD:AAE2387
-	USA	Illinois	-	-	-	-	Ictidomys tridecemlineatus	-	-	-	AF330007	-	-
Outgroups
-	Canada	Ontario	Wellington	ca. 1 km SW of Elora, David St. E	43.70	-80.44	Marmota monax	HLC-10596	Biodiversity Institute of Ontario	Borisenko A.V.	JF456717	ABMC296-05	BOLD:AAE9337
-	Russia	Yakutia	-	Kharaulakh Ridge	71.77	128.26	Marmota camtschatica	IDB-23978	Koltzov Institute of Developmental Biology, Russian Academy of Sciences	Boeskorov G.G.	KM537926	ABGPA118-14	BOLD:ACO5372
-	United States	South Dakota	-	10 km N of Hot Springs	43.31	-103.29	Cynomys ludovicianus	ZISP 85440	Zoological Institute, Russian Academy of Sciences	Tikhonova E.P.	KM537961	ABGPA106-09	BOLD:AAF8020
-	Turkmenistan	Chardzhou	Lebap, Lebapckiy	Seydi village (Neftezavodsk)	38.77	63.87	Spermophilopsis leptodactylus	IDB-24044	Koltzov Institute of Developmental Biology, Russian Academy of Sciences	Brandler O.V.	KM537903	ABGPA019-07	BOLD:AAJ3875
-	Russia	Republic of Altai	-	Gorno-Altaysk city	51.98	85.88	Tamias sibiricus	IDB-24746	Koltzov Institute of Developmental Biology, Russian Academy of Sciences	Bogdanov A.S.	KM537944	ABGPA027-07	BOLD:AAA6821
* see Figure 1
